# Supplementary material for: Composition and Formation Mechanism of Brown Carbon: Identification and Quantification of Phenolic Precursors
Source: Copernicus journal article supplement (doi:10.5194/egusphere-2025-1954), 2025-06-26
Supplement: Supplementary file 1 [file egusphere-2025-1954-supplement.pdf]

# **Composition and Formation Mechanism of Brown Carbon: Identification and Quantification of Phenolic Precursors**

Md. Al-amin Hossen<sup>1</sup>, Mehedi Hasan Shakil<sup>1</sup>, Md. Fahim Ehasan<sup>2</sup>, Abu Rayhan Mohammad Tareq<sup>2</sup>, Abdus Salam<sup>1\*</sup>

<sup>1</sup>Department of Chemistry, Faculty of Science, University of Dhaka, Dhaka-1000, Bangladesh

<sup>2</sup>Environmental and Organic Chemistry Laboratory, Chemistry Division, Atomic Energy Centre Dhaka, Bangladesh

\*Corresponding author: [asalam@gmail.com](mailto:asalam@gmail.com); [asalam@du.ac.bd](mailto:asalam@du.ac.bd)

## 1. Sampling locations

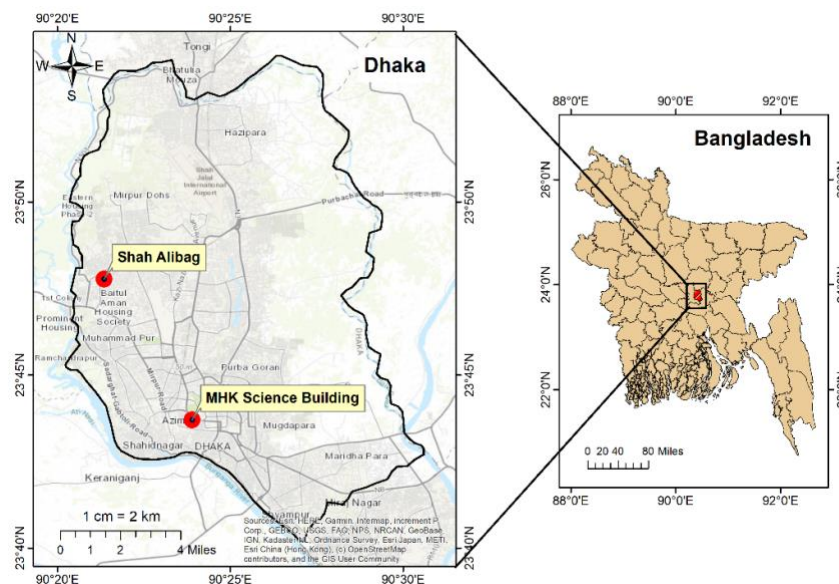

**Fig. S1:** Map of Bangladesh and Dhaka showing the sampling spots Mokarram Hussain Khundker Bhaban, University of Dhaka and Shah Alibag, Mirpur

## 2. Generated a Calibration Curve of Individual Standard Phenolic Compounds

The calibration curve for quantifying the phenolic component was established using the reference standard phenolic solution. A calibration curve was generated by graphing the peak area against the concentration by originPro 2024 software. The individual calibration curves for the desired chemicals are provided below.

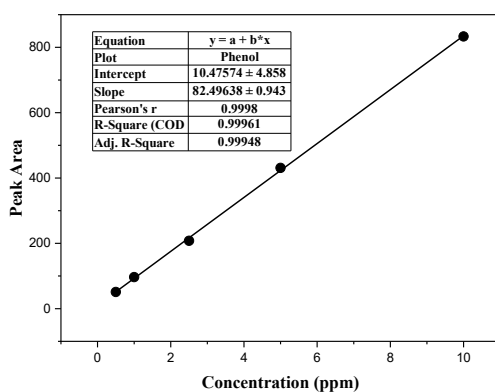

(a) Phenol

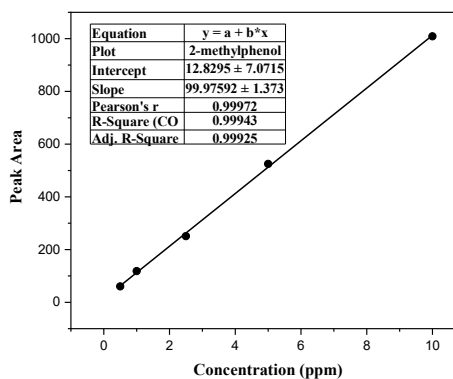

(b) 2-methylphenol

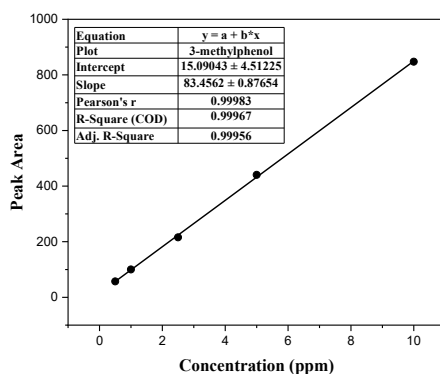

(c) 3-methylphenol

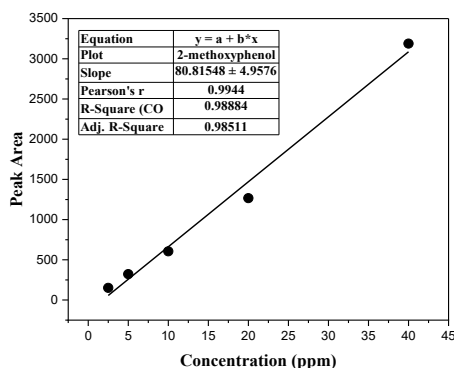

(d) 2-methoxyphenol

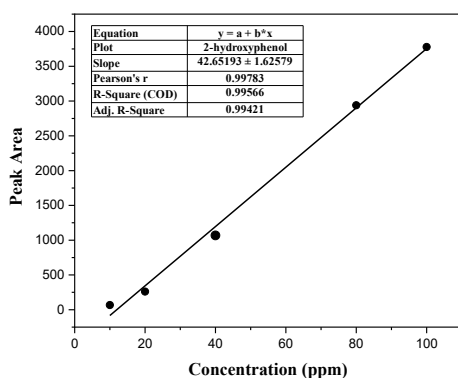

(e) 2-hydroxyphenol

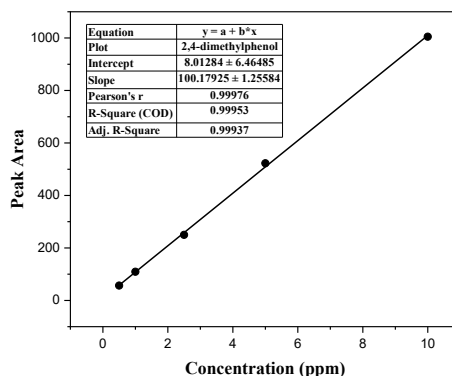

(f) 2,4-dimethylphenol

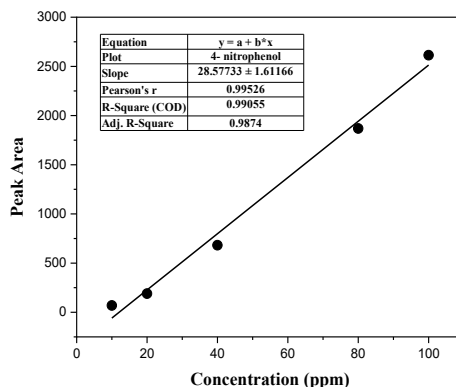

(g) 4-nitrophenol

Fig. S2: Calibration curve for seven phenolic compounds

### 3. Method validation

Method validation involves the determination of LOD (Limit of Detection), LOQ (Limit of Quantification), and Recovery rate:

#### 3.1 LOD & LOQ

LOD refers to the lowest concentration of an analyte sample that can be detected by an analytical method. On the other hand, LOQ refers to the lowest concentration of an analyte sample that can be quantified at a specific level of precision and accuracy by an analytical method. Both LOD and

LOQ were determined by injecting serially diluted mixtures of standard solution in GC-FID. For LOD, the peak area of each standard was considered 3 times higher than the baseline noise. In case of LOQ, it was ten times higher. Equations are given as follows

$$LOD = 3.3 \times \frac{\text{Standard Deviation of Intercept}}{\text{Slope of the Calibration Curve}}$$

$$LOQ = 10 \times \frac{\text{Standard Deviation of Intercept}}{\text{Slope of the Calibration Curve}}$$

### 3.2 Recovery through sample spiking

In this study to calculate the recovery rate, a known amount of analyte was added (spiked) into the test sample matrix, and its response was measured. The recovery experiment was carried out in three samples by spiking a known amount of standard. A blank sample and the two samples that gave very less signal/peak in the chromatogram were used as a sample matrix for the recovery test. A known amount of standard solutions was spiked to the filter sample and allowed the sample to stand for an hour to let the phenolic compound be absorbed into the filter matrix. Then extract this spiked sample by the same process of sample extraction. According to the following formula, recovery percentages were calculated.

$$R = \frac{C_{\text{Spiked}} - C_{\text{blank}}}{C_{\text{added}}} \times 100 \%$$

Where R is the recovery (%),  $C_{\text{spiked}}$  is the concentration of the phenolic compounds obtained from the chromatogram after spiking,  $C_{\text{blank}}$  is the concentration of the compound obtained from the chromatogram of blank samples,  $C_{\text{added}}$  is the concentration of the standard added initially in the matrix.

91

**Table S1: Data for recovery experiment**

| Standards                    | Spiked level (ppm) | Recovery (%) |
|------------------------------|--------------------|--------------|
| <b>Phenol</b>                | 2.5                | 82           |
|                              | 5                  | 85           |
| <b>2-methylphenol</b>        | 2.5                | 83           |
|                              | 5                  | 86           |
| <b>3-methylphenol</b>        | 2.5                | 89           |
|                              | 5                  | 84           |
| <b>2-methoxyphenol</b>       | 2.5                | 81           |
|                              | 5                  | 87           |
| <b>2,4- dimethylphenol</b>   | 2.5                | 83           |
|                              | 5                  | 85           |
| <b>2-hydroxyphenol</b>       | 2.5                | 89           |
|                              | 5                  | 91           |
| <b>2,4,6-trichlorophenol</b> | 2.5                | 82           |
|                              | 5                  | 85           |
| <b>4-nitrophenol</b>         | 2.5                | 82           |
|                              | 5                  | 87           |

92

93 **4. ATR-FTIR analysis**

94

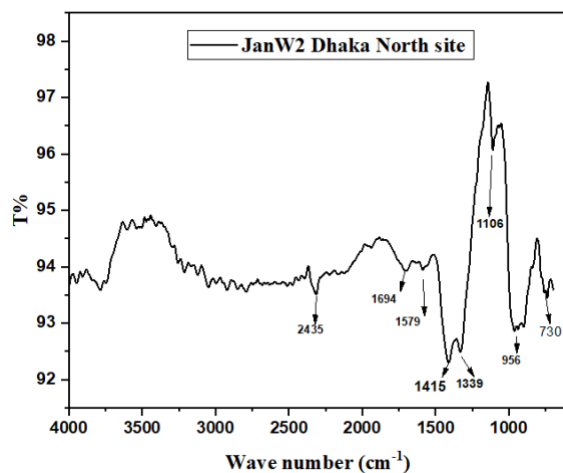

95

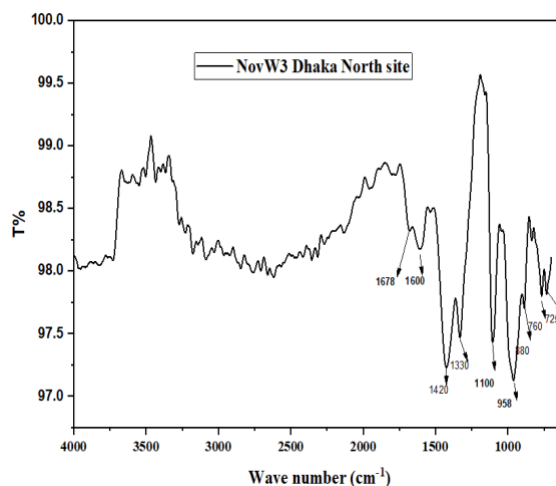

96

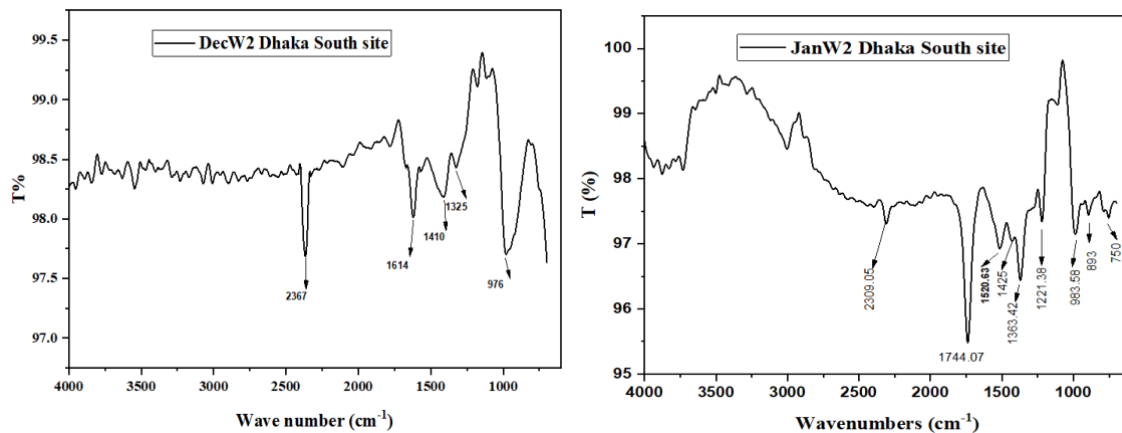

**Fig. S3: ATR-FTIR spectrum of particulate matter (PM<sub>2.5</sub>) in the Dhaka city**

## 5. Chromatogram of GC-FID

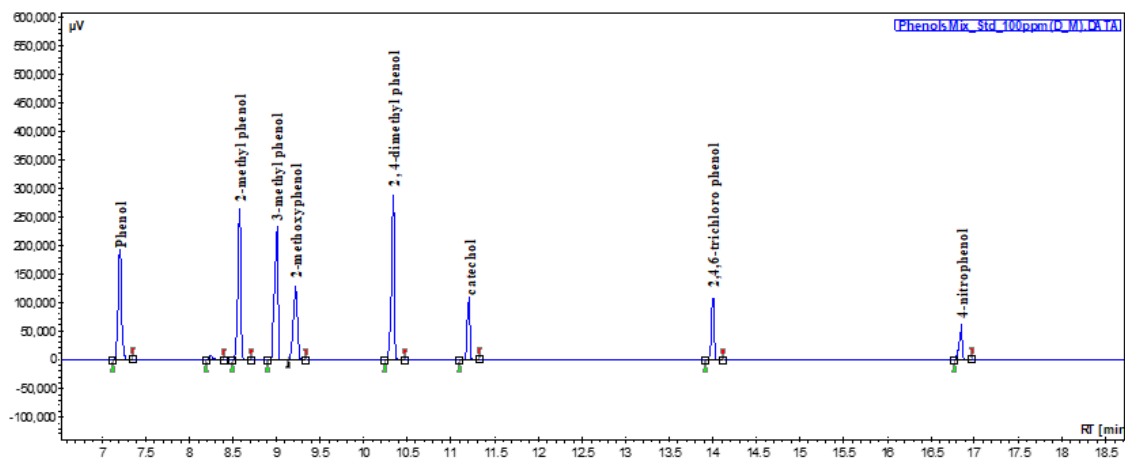

**Fig. S4: Chromatogram of standard phenolic compounds**

Table S2: Retention time of the standard phenolic compounds

| Analytical Standards       | Retention time (min) |
|----------------------------|----------------------|
| Phenol                     | 7.21                 |
| 2-methylphenol             | 8.59                 |
| 3-methylphenol             | 9.01                 |
| 2-methoxyphenol            | 9.22                 |
| 2,4-dimethylphenol         | 10.35                |
| 2-hydroxyphenol (catechol) | 11.21                |
| 2,4,6-trichlorophenol      | 14.01                |

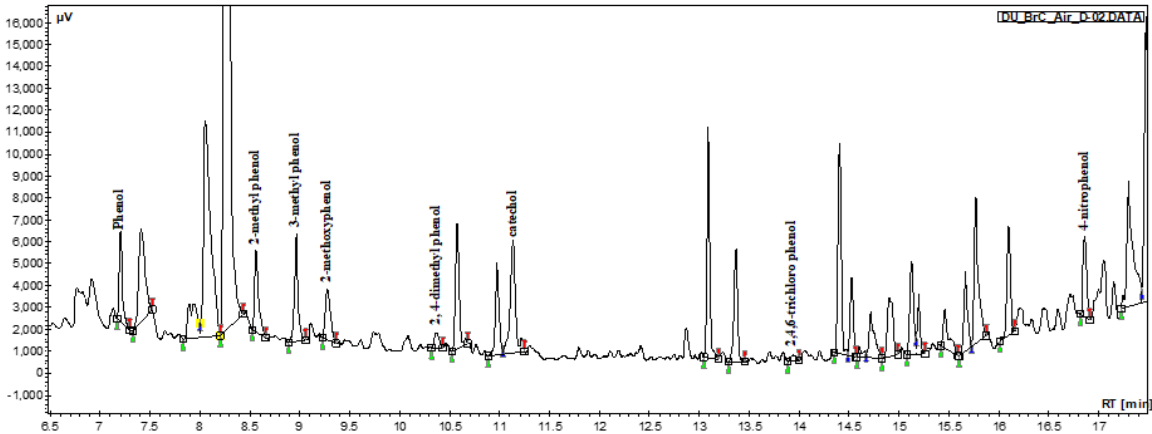

Fig. S5: Chromatogram of the sample D02 (sample at Dhaka South site, August second week)



123

**Table S3: Results of the chromatogram for D02 sample**

| Name of identified compounds | Retention time (min) | Quantity (ppm) from chromatogram | Calculated data for total sample ( $\mu\text{g m}^{-3}$ ) involve air volume |
|------------------------------|----------------------|----------------------------------|------------------------------------------------------------------------------|
| Phenol                       | 7.21                 | 1.85                             | 0.16                                                                         |
| 2-methylphenol               | 8.59                 | 1.5                              | 0.13                                                                         |
| 3-methylphenol               | 9.01                 | 2.59                             | 0.23                                                                         |
| 2-methoxyphenol              | 9.22                 | 3.46                             | 0.30                                                                         |
| 2,4-dimethylphenol           | 10.35                | 0.41                             | 0.04                                                                         |
| 2-hydroxyphenol (catechol)   | 11.21                | 19.06                            | 1.69                                                                         |
| 2,4,6-trichlorophenol        | 14.01                | 0.55                             | 0.05                                                                         |
| 4-nitrophenol                | 16.85                | 17.48                            | 1.54                                                                         |

124

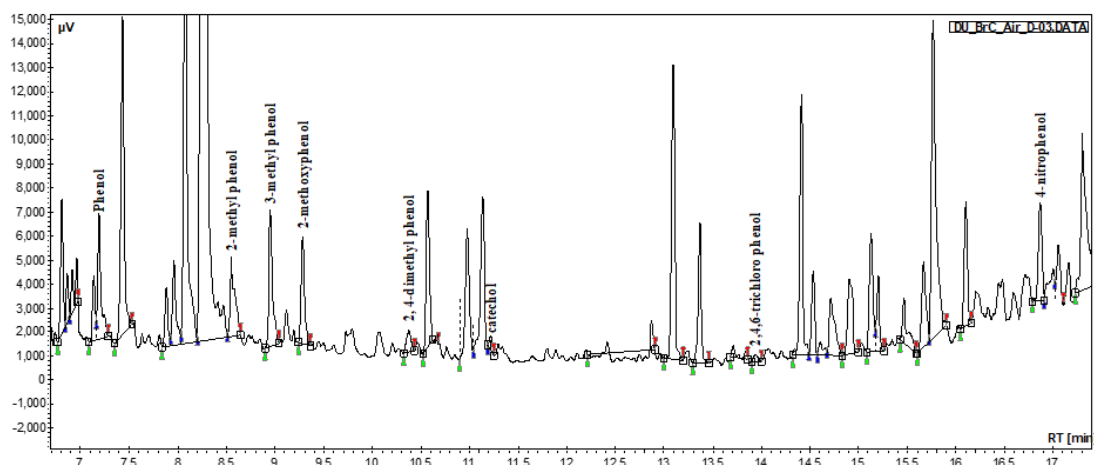

125

126

**Fig. S6: Chromatogram of sample D-03 (sample at Dhaka South site, September 2<sup>nd</sup> week)**

128

129

**Table S4: Results of sample D-03**

| Name of identified compounds | Retention time (min) | Quantity (ppm) from chromatogram | Calculated conc. for total sample ( $\mu\text{g m}^{-3}$ ) involve air volume |
|------------------------------|----------------------|----------------------------------|-------------------------------------------------------------------------------|
| Phenol                       | 7.19                 | 2.44                             | 0.55                                                                          |
| 2-methylphenol               | 8.55                 | 1.77                             | 0.40                                                                          |
| 3-methylphenol               | 8.96                 | 3.02                             | 0.68                                                                          |

|                            |       |       |      |
|----------------------------|-------|-------|------|
| 2-methoxyphenol            | 9.28  | 3.96  | 0.90 |
| 2,4-dimethylphenol         | 10.38 | 0.51  | 0.12 |
| 2-hydroxyphenol (catechol) | 11.22 | 12.39 | 2.82 |
| 2,4,6-trichlorophenol      | 13.96 | 0.52  | 0.12 |
| 4-nitrophenol              | 16.87 | 17.77 | 4.04 |

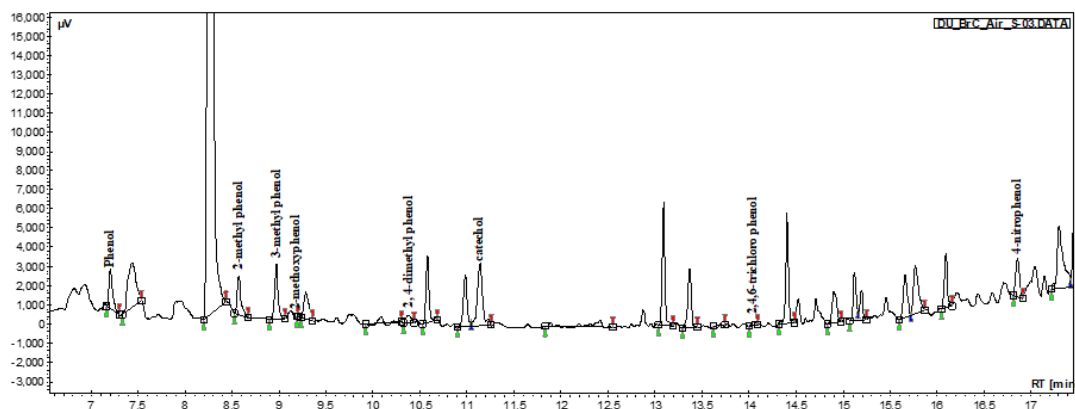

**Fig. S7: Chromatogram of the sample M03 (sample at Mirpur, Dhaka North in September 2<sup>nd</sup> week)**

**Table S5: Results of the M03 sample obtained from the chromatogram**

| Name of identified compounds | Retention time (min) | Quantity (ppm) from chromatogram | Calculated conc. for total sample ( $\mu\text{g m}^{-3}$ ) involve air volume |
|------------------------------|----------------------|----------------------------------|-------------------------------------------------------------------------------|
| Phenol                       | 7.21                 | 1.02                             | 0.09                                                                          |
| 2-methylphenol               | 8.59                 | 0.82                             | 0.08                                                                          |
| 3-methylphenol               | 9.01                 | 1.57                             | 0.15                                                                          |
| 2-methoxyphenol              | 9.22                 | 1.8                              | 0.17                                                                          |
| 2,4-dimethylphenol           | 10.35                | 0.26                             | 0.02                                                                          |
| 2-hydroxyphenol (catechol)   | 11.21                | 16.54                            | 1.53                                                                          |
| 2,4,6-trichlorophenol        | 14.01                | 0.4                              | 0.04                                                                          |
| 4-nitrophenol                | 16.85                | 15.04                            | 1.4                                                                           |

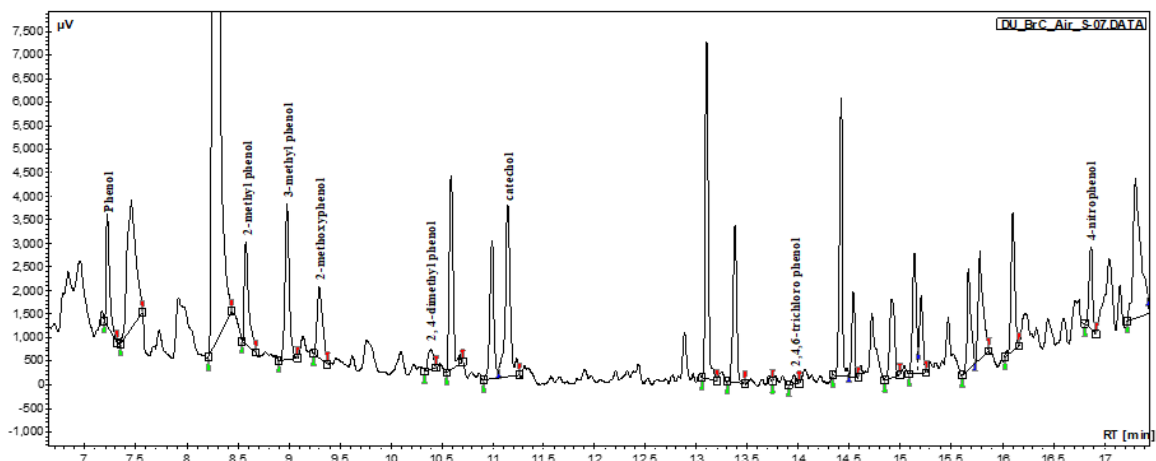

**Fig. S8: Chromatogram of the sample S07 (January 2<sup>nd</sup> week, 2024 at Mirpur, Dhaka South)**

**Table S6: Results of sample S07**

| Name of identified compounds | Retention time (min) | Quantity (ppm) from chromatogram | Calculated conc. for total sample ( $\mu\text{g m}^{-3}$ ) involve air volume |
|------------------------------|----------------------|----------------------------------|-------------------------------------------------------------------------------|
| Phenol                       | 7.21                 | 1.13                             | 0.13                                                                          |
| 2-methylphenol               | 8.59                 | 0.87                             | 0.10                                                                          |
| 3-methylphenol               | 9.01                 | 1.73                             | 0.19                                                                          |
| 2-methoxyphenol              | 9.22                 | 3.02                             | 0.34                                                                          |
| 2,4-dimethylphenol           | 10.35                | 0.27                             | 0.03                                                                          |
| 2-hydroxyphenol (catechol)   | 11.21                | 17.15                            | 1.92                                                                          |
| 2,4,6-trichlorophenol        | 14.01                | 0.33                             | 0.04                                                                          |
| 4-nitrophenol                | 16.85                | 14.78                            | 1.65                                                                          |

146 **Table S7: Concentration of phenolic precursors of BrC in three seasons from July 2023 to**  
147 **January 2024 in Dhaka, Bangladesh**

| Compositions<br>( $\mu\text{g m}^{-3}$ ) | Dhaka North site (Mirpur) |                  |                  | Dhaka South site (DU) |                  |                 |
|------------------------------------------|---------------------------|------------------|------------------|-----------------------|------------------|-----------------|
|                                          | Monsoon                   | Post-<br>monsoon | Winter           | Monsoon               | Post-<br>monsoon | Winter          |
| Phenol                                   | 0.09 $\pm$ 0.02           | 0.14 $\pm$ 0.02  | 0.12 $\pm$ 0.03  | 0.20 $\pm$ 0.10       | 0.20 $\pm$ 0.06  | 0.48 $\pm$ 0.22 |
| 2-methylphenol                           | 0.06 $\pm$ 0.02           | 0.10 $\pm$ 0.04  | 0.09 $\pm$ 0.02  | 0.13 $\pm$ 0.07       | 0.35 $\pm$ 0.06  | 0.48 $\pm$ 0.24 |
| 3-methylphenol                           | 0.13 $\pm$ 0.02           | 0.19 $\pm$ 0.05  | 0.18 $\pm$ 0.05  | 0.22 $\pm$ 0.13       | 0.35 $\pm$ 0.058 | 0.79 $\pm$ 0.43 |
| 2-methoxyphenol                          | 0.22 $\pm$ 0.06           | 0.33 $\pm$ 0.10  | 0.33 $\pm$ 0.10  | 0.31 $\pm$ 0.16       | 0.34 $\pm$ 0.18  | 1.01 $\pm$ 0.62 |
| 2,4-dimethylphenol                       | 0.021 $\pm$ 0.002         | 0.03 $\pm$ 0.01  | 0.024 $\pm$ 0.01 | 0.04 $\pm$ 0.02       | 0.05 $\pm$ 0.015 | 0.13 $\pm$ 0.07 |
| 2-hydroxyphenol                          | 1.44 $\pm$ 0.07           | 1.78 $\pm$ 0.53  | 1.82 $\pm$ 0.51  | 1.34 $\pm$ 0.31       | 2.44 $\pm$ 0.16  | 5.04 $\pm$ 3.42 |
| 4-nitrophenol                            | 1.34 $\pm$ 0.09           | 1.65 $\pm$ 0.44  | 1.62 $\pm$ 0.52  | 1.52 $\pm$ 0.64       | 2.50 $\pm$ 0.43  | 4.54 $\pm$ 2.94 |

148

149
